# Supplementary material for: Pattern formation and collective effects during the process of the motion of magnetic nanomotors in narrow channels
Source: Royal Society of Chemistry journal article supplement (doi:10.1039/d3cp00435j), 2023-01-01
Supplement: d3cp00435j1.pdf [file d3cp00435j1.pdf]

Electronic supplementary information (ESI) for PCCP.

## Supporting Information

Pattern formation and collective effects in the process of the motion of magnetic nanomotors in narrow channels

*Boris Kichatov <sup>a,\*</sup>, Alexey Korshunov <sup>a</sup>, Vladimir Sudakov <sup>a</sup>, Vladimir Gubernov <sup>a</sup>, Alexandr Golubkov <sup>a</sup>, Alexey Kiverin <sup>b</sup>, Alena Nastulyavichus <sup>a</sup>, and Sergey Kudryashov <sup>a</sup>*

<sup>a</sup>Lebedev Physical Institute, Russian Academy of Sciences, 119991 Moscow, Russia

<sup>b</sup>Joint Institute for High Temperatures, Russian Academy of Sciences, 125412 Moscow, Russia

\*Correspondence to: b9682563@yandex.ru

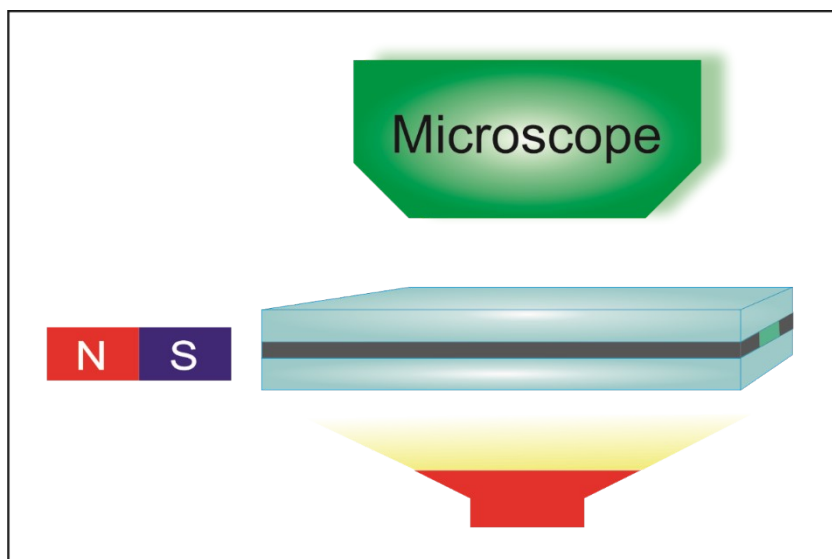

**Figure S1.** Schematic of the experimental setup.

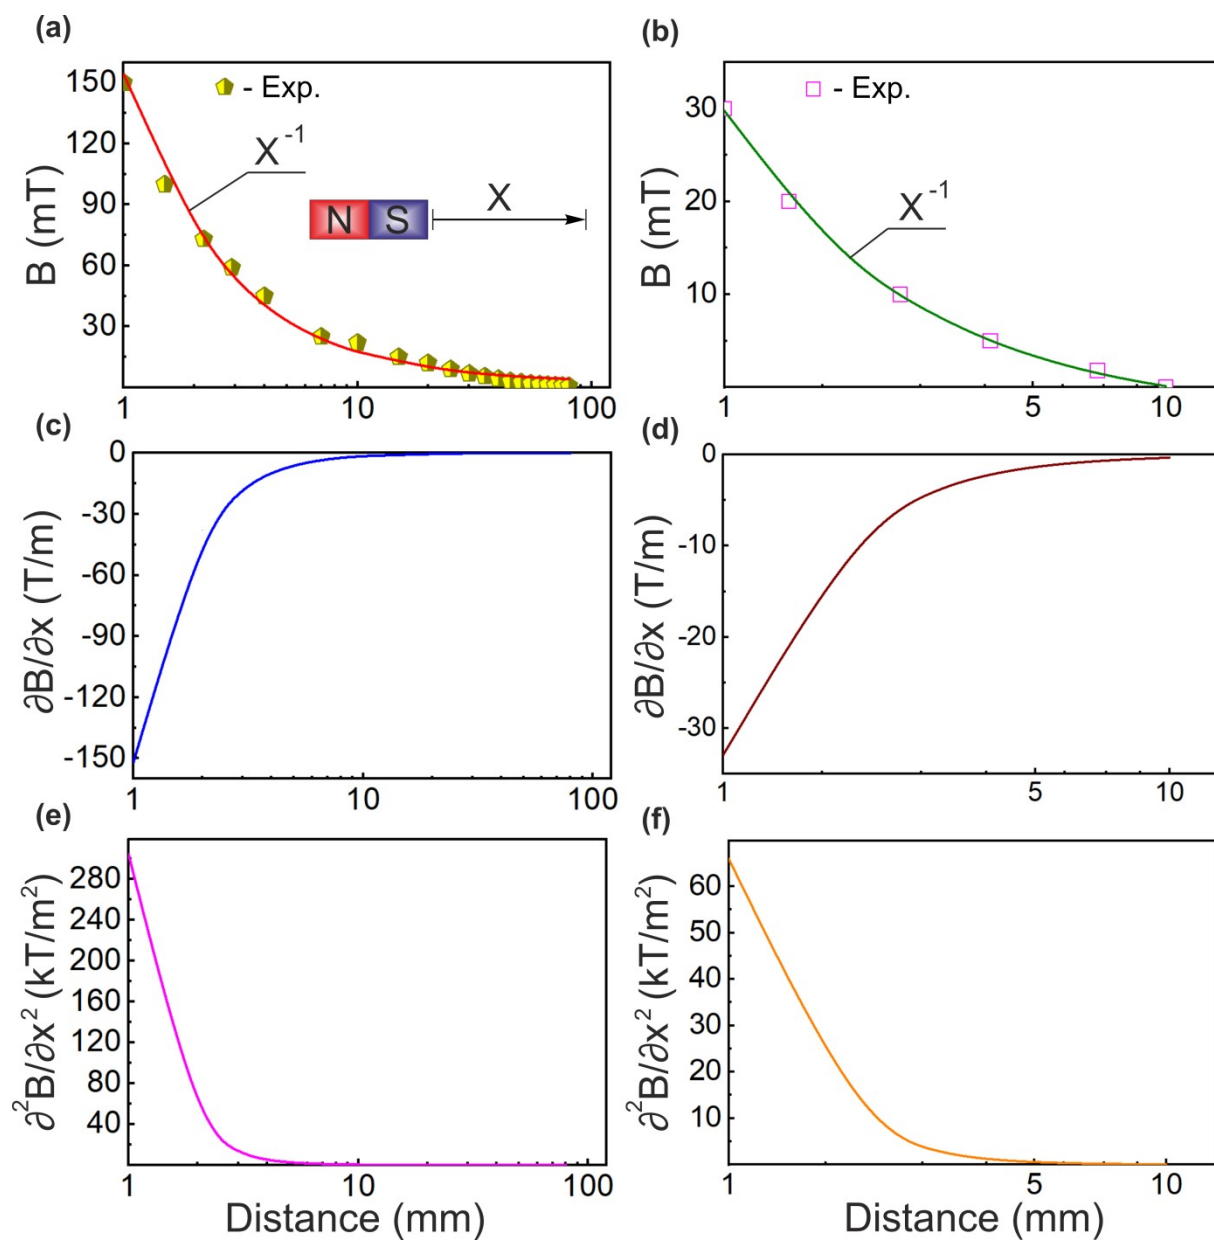

**Figure S2.** (a), (b) Distribution of the magnetic field strength near the permanent magnet. (c), (d) Distribution of  $\partial B/\partial x$  near the permanent magnet. (e), (f) Distribution of  $\partial^2 B/\partial^2 x$  near the permanent magnet.

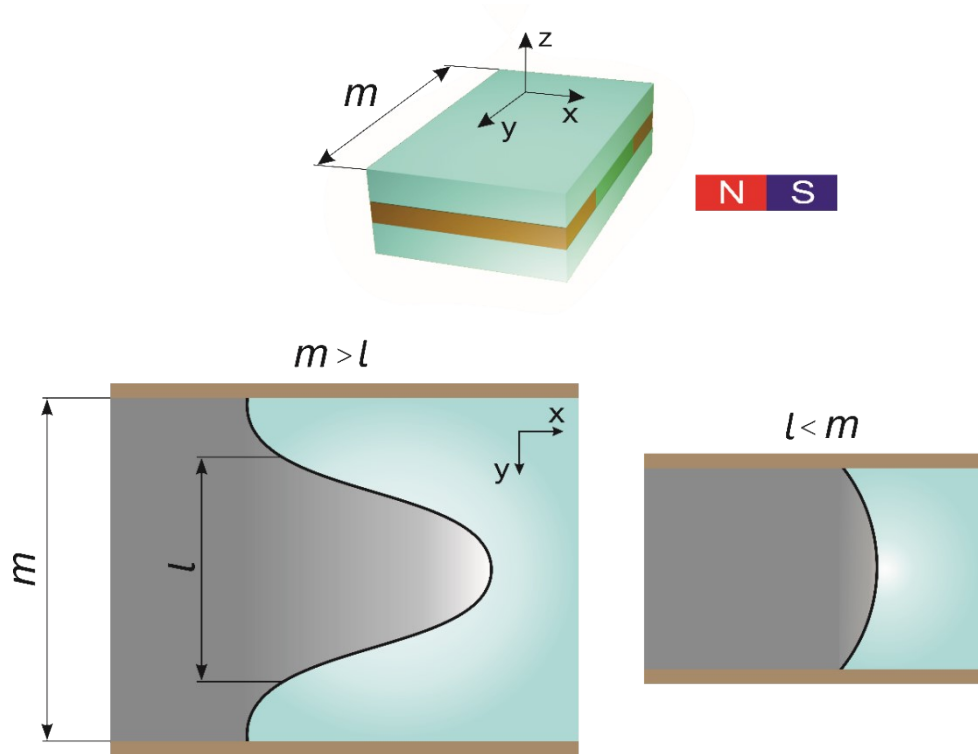

**Figure S3.** If the channel width occurs to be smaller than characteristic linear scale of perturbations, then there is no development of perturbations on the front.

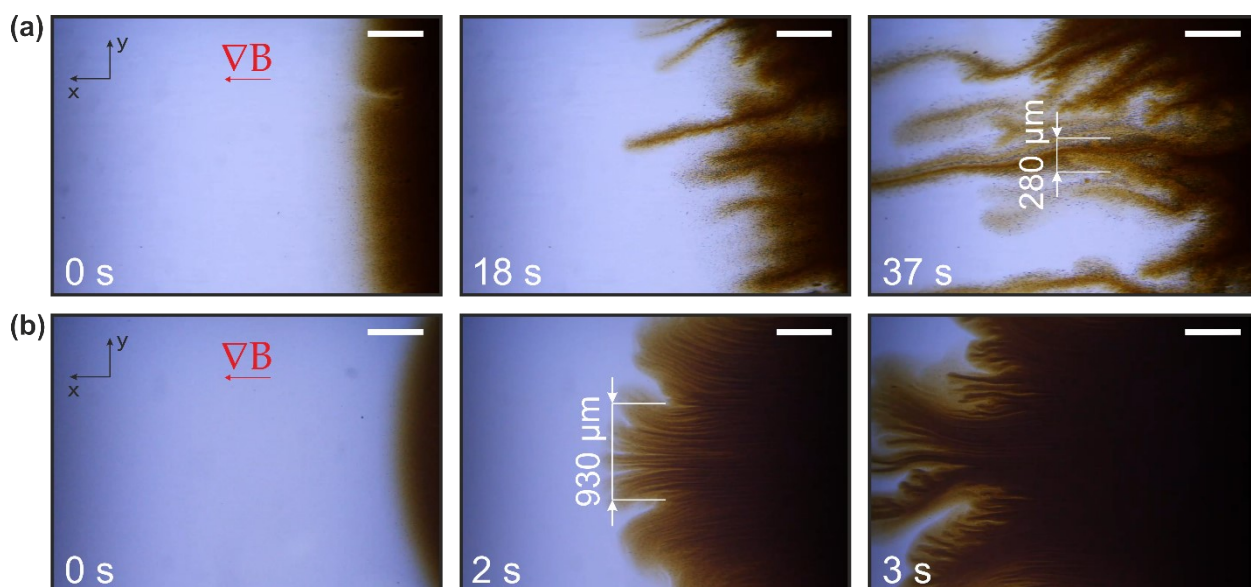

**Figure S4.** Time-elased optical photographs showing the process of front propagation at varied concentration of NPs. Time is counted starting from the initiation of observation. Scale bars: 500  $\mu\text{m}$ . (a) Aqueous suspension Fe<sub>3</sub>O<sub>4</sub> 7.0 wt.%; (b) 3.5 wt.%.

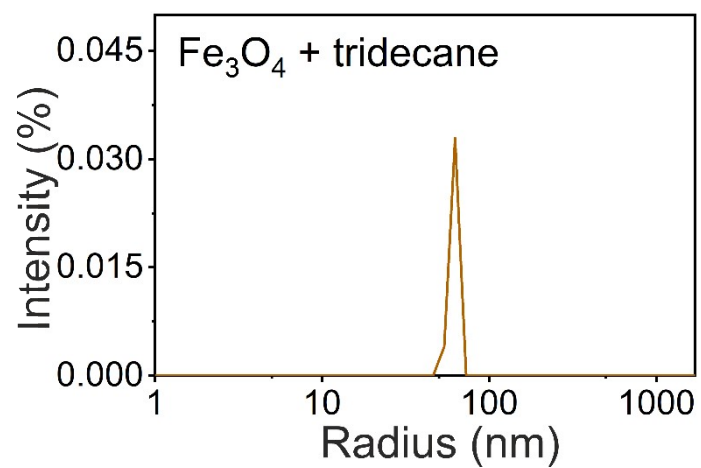

**Figure S5.** Distribution of hydrodynamic radii of the Fe<sub>3</sub>O<sub>4</sub> suspended in tridecane.

## Supporting videos

**Video S1.** Collective motion of magnetic nanomotors in channel. Nanoparticles  $\text{Fe}_3\text{O}_4$  are suspended in water, channel height is  $30 \mu\text{m}$ , concentration of nanoparticles in the suspension is 7 wt. %. Frequency of filming is reduced by 50 %.

**Video S2.** Development of perturbations on the propagating front of nanoparticles suspended in tridecane. Channel height is  $3 \mu\text{m}$ , concentration of nanoparticles in the suspension is 7 wt. %. Frequency of filming is reduced by 30 %.

**Video S3.** Development of perturbations on the propagating front of nanoparticles suspended in water. Channel height is  $3 \mu\text{m}$  concentration of nanoparticles in the suspension is 7 wt. %. Frequency of filming is accelerated by factor of 7.

**Video S4.** Front instability at  $\partial^2 B / \partial x^2 = 20 \text{ kT} / \text{m}^2$ . Channel height is  $30 \mu\text{m}$ , concentration of nanoparticles in the suspension is 7 wt. %. Frequency of filming is reduced by 70 %.

**Video S5.** Front instability at  $\partial^2 B / \partial x^2 = 5 \text{ kT} / \text{m}^2$ . Channel height is  $30 \mu\text{m}$ , concentration of nanoparticles in the suspension is 7 wt. %. Frequency of filming is reduced by 30 %.
